# Supplementary material for: Ultra-fast Data Sanitization of Sram by Back-biasing to Resist a Cold Boot Attack
Source: Research Square preprint supplement (doi:10.21203/rs.3.rs-493322/v1), 2021-05-10
Supplement: Supplementary file 1 [file 43d26167c890fb7535e26fcd.docx]

**Supplementary Information**

**Ultra-fast Data Sanitization of SRAM by Back-biasing to Resist a Cold Boot Attack**

*Seong-Joo Han1†, Joon-Kyu Han1†, Gyeong-Jun Yun1, Mun-Woo Lee1, Ji-Man Yu1, and Yang-Kyu Choi1,a)*

†These authors equally contributed to this work

1School of Electrical Engineering, Korea Advanced Institute of Science and Technology, (KAIST) 291 Daehak-ro, Yuseong-gu, Daejeon 34141, Republic of Korea

1. Authors to whom correspondence should be addressed.

Email addresses: ykchoi@ee.kaist.ac.kr

**Erasing time depending on load capacitance**

**Figure S1.** Capacitance dependent erasing for **(a)** permanent and **(b)** temporary erasing at 298 K and 173 K.

**Layout innovation for back-bias utilized 6T-SRAM**

**Figure S2.** **(a)** Conventional layout of high-density 6T-SRAM. **(b)** Possible layout innovation to realize proposed data sanitization scheme by back-biasing.

**Cross-section of high-density 6T-SRAM layout**

**Figure S3.** Cross-section of conventional layout of high-density 6T-SRAM and possible layout innovation to realize proposed data sanitization scheme by back-biasing.
